# Supplementary material for: Cation exchange reaction derived amorphous bimetal hydroxides as advanced battery materials for hybrid supercapacitors
Source: Royal Society of Chemistry journal article supplement (doi:10.1039/c8ta07609j), 2018-01-01
Supplement: c8ta07609j1.pdf [file c8ta07609j1.pdf]

## Electronic Supplementary Information

### Cation exchange reaction derived amorphous bimetal hydroxides as advanced battery materials for hybrid supercapacitors

Chenghao Huang, Xinxin Song, Yanliang Qin, Binghui Xu and Hai Chao Chen\*

*Institute of Materials for Energy and Environment, School of Materials Science and Engineering, Qingdao University, Qingdao 266071, China.*

\*Corresponding author E-mail: chenhchust@126.com, chenhc@qdu.edu.cn (H. C. Chen)

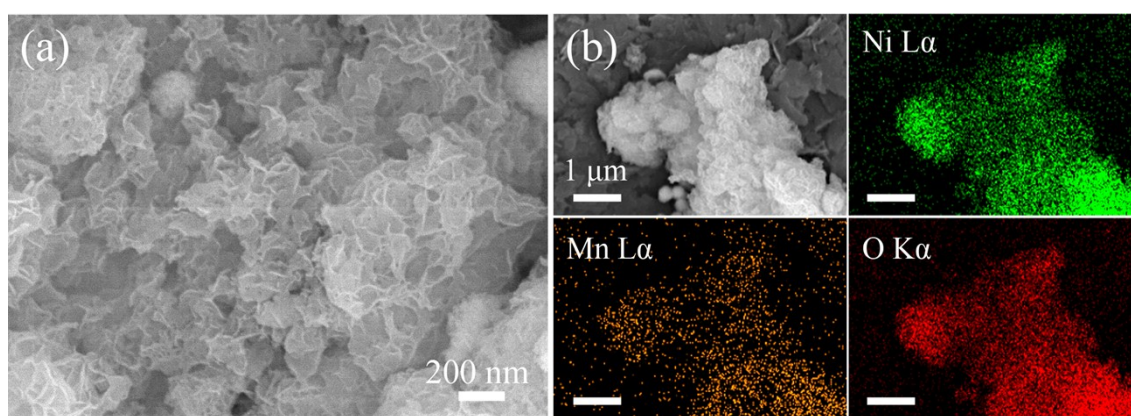

**Fig. S1** (a) SEM and (b) EDS mapping images of Ni–Mn sample.

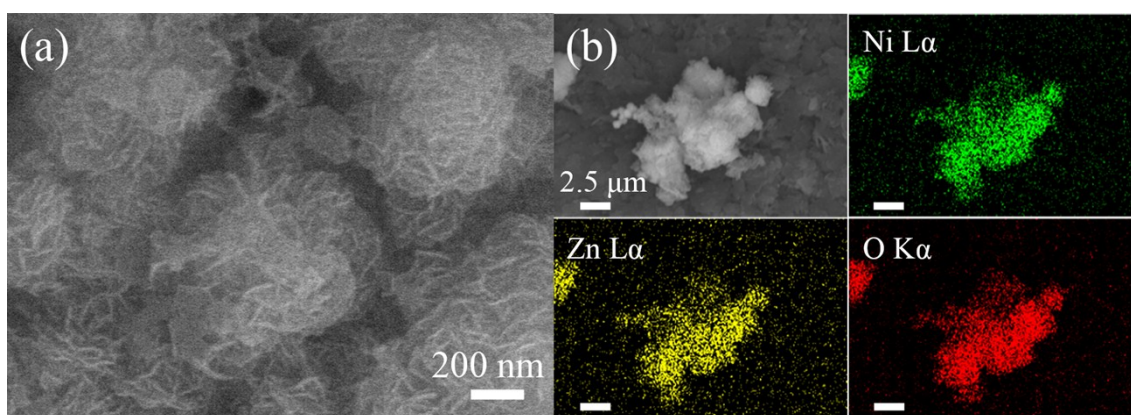

**Fig. S2** (a) SEM and (b) EDS mapping images of Ni–Zn sample..

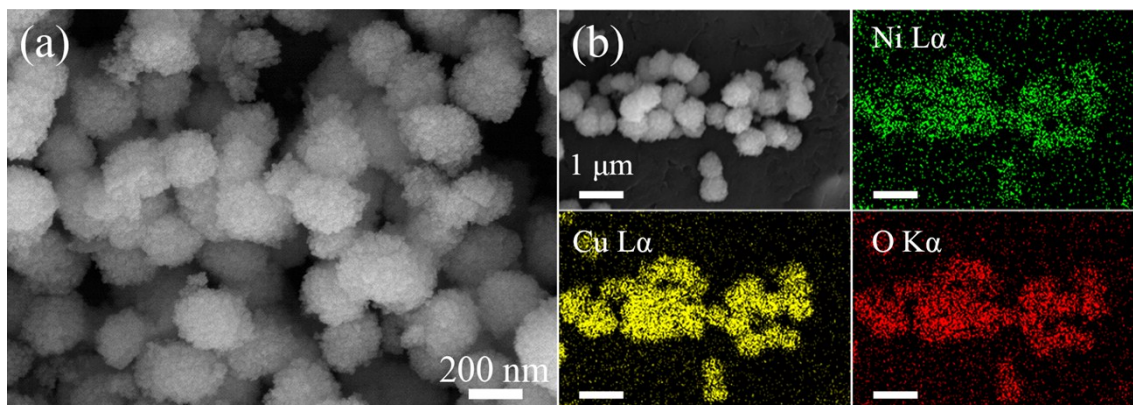

**Fig. S3** (a) SEM and (b) EDS mapping images of Ni–Cu sample.

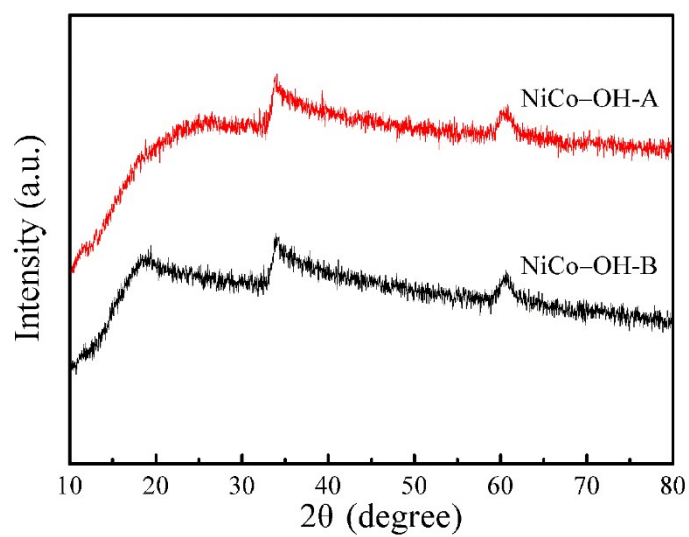

**Fig. S4** XRD patterns of amorphous NiCo–OH-A and NiCo–OH-B.

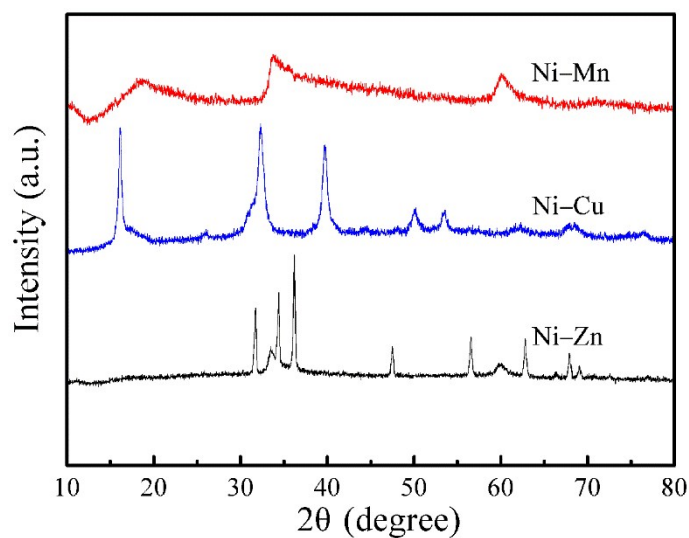

**Fig. S5** XRD patterns of Ni–Mn, Ni–Zn and Ni–Cu samples.

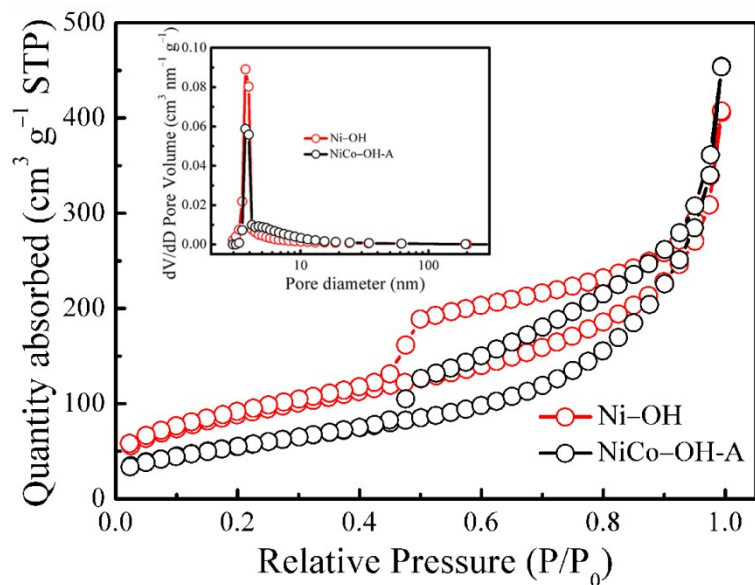

**Fig. S6** Nitrogen adsorption-desorption isotherms and the corresponding pore size distribution curves (inset) of NiCo-OH-A and Ni-OH.

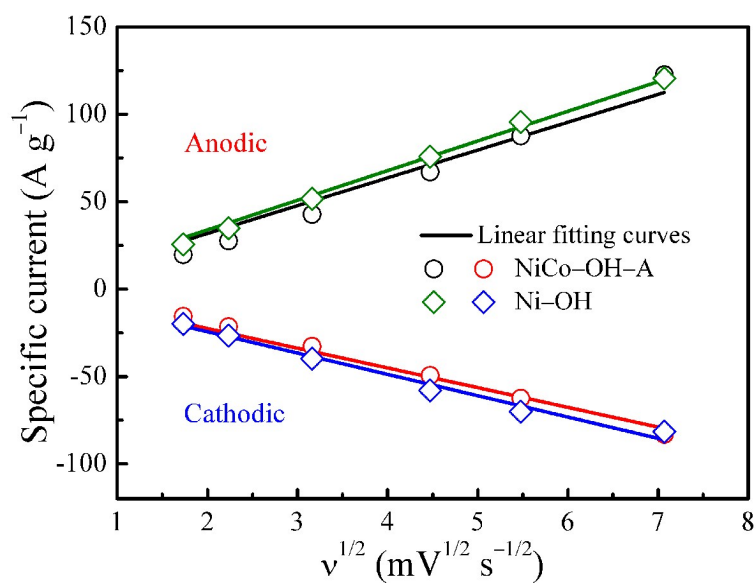

**Fig. S7** Experimental and linear fitting results of the specific currents of CV redox peaks as a function of  $v^{1/2}$  for the NiCo-OH-A and Ni-OH samples.

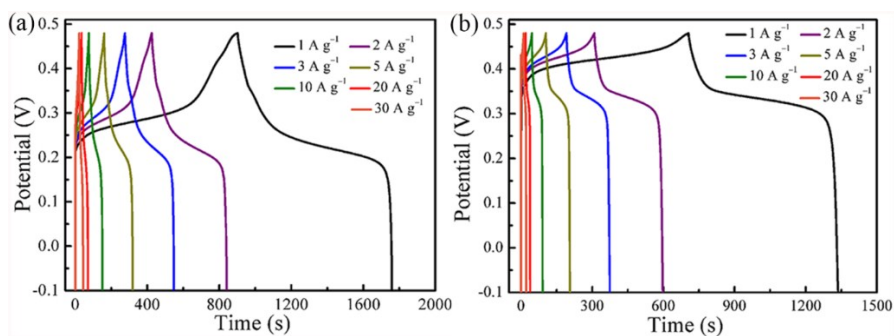

**Fig. S8** GCD curves of the (a) NiCo-OH-B and (b) Ni-OH.

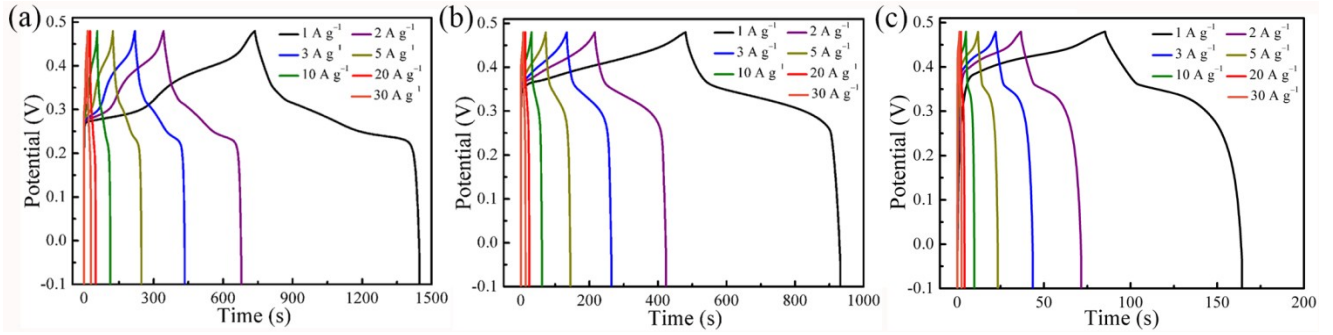

**Fig. S9** GCD curves of the (a) Ni-Mn, (b) Ni-Zn and (c) Ni-Cu samples.

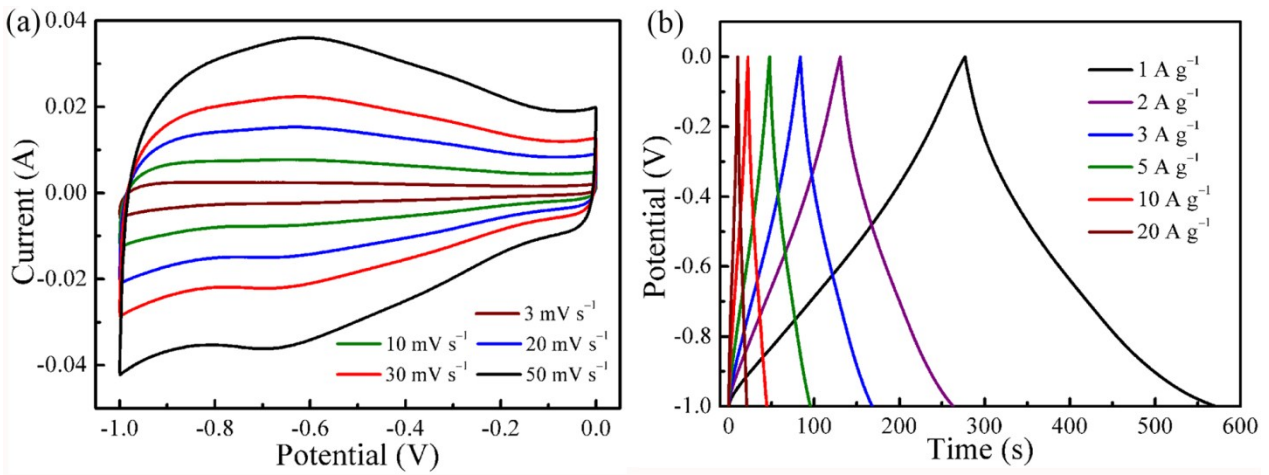

**Fig. S10** (a) CV curves and (b) GCD curves of the RGO electrode.

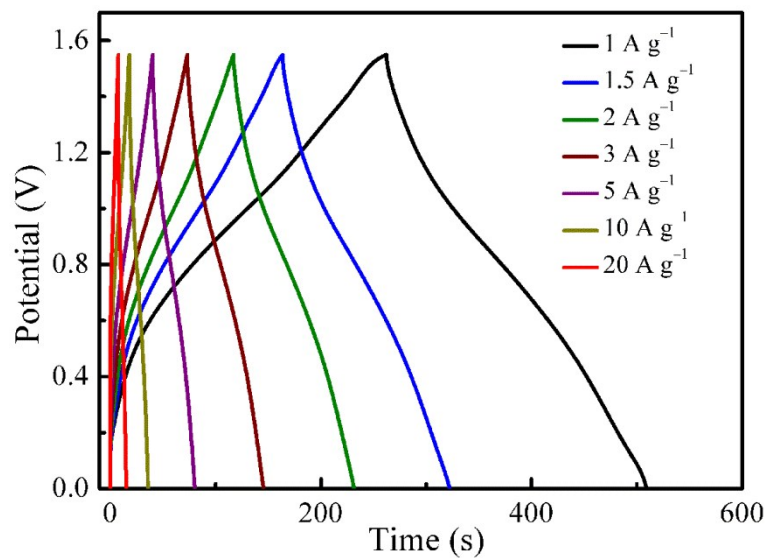

**Fig. S11** GCD curves of the NiCo-OH-A/RGO HSC.

**Table S1** The specific energy and specific power performances of the HSCs based on multi-metal hydroxides reported in references.

| Types of HSC                                                                | Specific energy<br>(Wh kg <sup>-1</sup> )                           | Reference |
|-----------------------------------------------------------------------------|---------------------------------------------------------------------|-----------|
| NiCo–OH-A//RGO                                                              | 49.9 (727 W kg <sup>-1</sup> ), 21.1 (17.51 Kw kg <sup>-1</sup> )   | This work |
| $\alpha$ -NiCo hydroxide//AC                                                | 42.5 (400 W kg <sup>-1</sup> ), 10.7 (6.4 Kw kg <sup>-1</sup> )     | [49]      |
| Ultrathin NiCo hydroxide sheets//AC                                         | 42.4 (823.2 W kg <sup>-1</sup> ), 24.8 (10.17 Kw kg <sup>-1</sup> ) | [50]      |
| Co <sub>0.5</sub> Ni <sub>0.5</sub> (OH) <sub>2</sub> /graphene/CNT//AC/CNT | 41 (210 W kg <sup>-1</sup> ), 29 (4.2 Kw kg <sup>-1</sup> )         | [16]      |
| $\alpha$ -(Ni/Co)(OH) <sub>2</sub> /graphene//AC                            | 41 (216 W kg <sup>-1</sup> ), 29.3 (4.2 Kw kg <sup>-1</sup> )       | [39]      |
| NiCo LDH/carbon nanorods//AC                                                | 25.4 (749 W kg <sup>-1</sup> ), 6.4 (7.4 Kw kg <sup>-1</sup> )      | [40]      |
| 3D NiCo hydroxide/graphene/nickel foam//AC                                  | 33.75 (750 W kg <sup>-1</sup> ), 20.84 (7.5 Kw kg <sup>-1</sup> )   | [51]      |
| N-doped carbonized bacterial cellulose (CBC-N)/NiCo LDH//CBC-N              | 36.3 (800.2 W kg <sup>-1</sup> ), 22.7 (8.0 Kw kg <sup>-1</sup> )   | [52]      |
| Graphene-encapsulated carbon@NiAl LDH core-shell spheres//RGO               | 35.5 (670.7 W kg <sup>-1</sup> ), 32.1 (5.58 Kw kg <sup>-1</sup> )  | [43]      |
| NiAl LDH hollow microspheres//AC nanofibers                                 | 20 (750 W kg <sup>-1</sup> ), 6.6 (11.25 Kw kg <sup>-1</sup> )      | [53]      |
| CoAl LDH supported by dodecyl sulfate-graphene//graphene/AC                 | 41.2 (185.4 W kg <sup>-1</sup> ), 20.4 (9.3 Kw kg <sup>-1</sup> )   | [54]      |
| NiCoMn hydroxide nanoflakes on nickel foam//RGO                             | 55.42 (750 W kg <sup>-1</sup> ), 14.58 (3.75 Kw kg <sup>-1</sup> )  | [55]      |
| MnCo LDH@Ni(OH) <sub>2</sub> heterostructures on Ni foam//AC                | 47.9 (750.7 W kg <sup>-1</sup> ), 9.8 (5.02 Kw kg <sup>-1</sup> )   | [56]      |
